# Supplementary material
Source: PubMed Central journal article supplement (PMC8640406)
Supplement: ejhpharm-2021-002787supp001.pdf [file ejhpharm-2021-002787supp001.pdf]

|                                                   | Drop out patients (n=16) | Patients ending the study (n=73) | p-value (t student or $\chi^2$ ) |
|---------------------------------------------------|--------------------------|----------------------------------|----------------------------------|
| Age (yr)                                          | 62.4 ± 6.8               | 60.0 ± 3.0                       | 0.532 <sup>a</sup>               |
| Body mass index (kg/m <sup>2</sup> )              | 28.2 ± 1.9               | 27.6 ± 1.2                       | 0.619 <sup>a</sup>               |
| Number of men (n)                                 | 7 (43.8%)                | 48 (65.7%)                       | 0.100 <sup>b</sup>               |
| Social level (n)                                  |                          |                                  |                                  |
| 1                                                 | 9 (56.3%)                | 24 (32.9%)                       |                                  |
| 2                                                 | 2 (12.5%)                | 16 (21.9%)                       | 0.211 <sup>b</sup>               |
| 3                                                 | 5 (31.3%)                | 33 (45.2%)                       |                                  |
| Kidney failure (n)                                | 2 (12.5%)                | 12 (16.4%)                       | NA                               |
| Liver failure (n)                                 | 0 (0.0%)                 | 1 (1.4%)                         | NA                               |
| Number of total chronic disease (n)               |                          |                                  |                                  |
| 1                                                 | 2 (12.5%)                | 17 (23.3%)                       |                                  |
| 2                                                 | 7 (43.8%)                | 19 (26.0%)                       | 0.324 <sup>b</sup>               |
| >2                                                | 7 (43.8%)                | 37 (50.7%)                       |                                  |
| Number of diseases involved in the study (n)      |                          |                                  |                                  |
| 1                                                 | 13 (81.3%)               | 60 (82.2%)                       | 0.929 <sup>b</sup>               |
| Hypertension                                      | 6 (37.5%)                | 40 (54.8%)                       |                                  |
| Type 2 diabetes                                   | 5 (31.3%)                | 10 (13.7%)                       | 0.202 <sup>b</sup>               |
| Hypercholesterolemia                              | 2 (12.5%)                | 10 (13.7%)                       |                                  |
| 2                                                 | 3 (18.8%)                | 12 (16.4%)                       | 0.823 <sup>b</sup>               |
| Hypertension + Type 2 diabetes                    | 3 (18.8%)                | 9 (12.3%)                        | 0.386 <sup>b</sup>               |
| Hypertension + Hypercholesterolemia               | 0 (0.0%)                 | 1 (1.4%)                         | NA                               |
| Type 2 diabetes + Hypercholesterolemia            | 0 (0.0%)                 | 2 (2.8%)                         | NA                               |
| 3                                                 | 0 (0.0%)                 | 1 (1.4%)                         | NA                               |
| Number of different drugs prescribed              | 5.6 ± 1.5                | 5.6 ± 0.8                        | 0.992 <sup>a</sup>               |
| Adjusted number of different drugs prescribed (n) |                          |                                  |                                  |
| <5                                                | 7 (43.8%)                | 29 (39.7%)                       |                                  |
| ≥5                                                | 9 (56.3%)                | 44 (60.3%)                       | 0.766 <sup>b</sup>               |

|                                              |           |            |                    |
|----------------------------------------------|-----------|------------|--------------------|
| <b>Side effects at the inclusion (n)</b>     | 5 (31.3%) | 15 (20.5%) | 0.352 <sup>b</sup> |
| <b>Adherence score at the inclusion</b>      | 1.8 ± 0.6 | 2.1 ± 0.3  | 0.348 <sup>a</sup> |
| <b>Patient with hypertension (n)</b>         | 9 (56.3%) | 51 (69.9%) | 0.292 <sup>b</sup> |
| <b>used as primary outcome</b>               | 7 (43.8%) | 49 (67.1%) | 0.080 <sup>b</sup> |
| <b>Patient with type II diabetes (n)</b>     | 5 (31.3%) | 22 (30.1%) | 0.930 <sup>b</sup> |
| <b>used as primary outcome</b>               | 5 (31.3%) | 11 (15.0%) | 0.127 <sup>b</sup> |
| <b>Patient with hypercholesterolemia (n)</b> | 5 (31.3%) | 14 (19.2%) | 0.286 <sup>b</sup> |
| <b>used as primary outcome</b>               | 4 (25%)   | 13 (17.8%) | 0.507 <sup>b</sup> |

**Supplemental Table 1:** characteristics at baseline of drop out and patients ending the study. Data are expressed as proportion of patients and in number of patients for qualitative variables, and as mean ± 95% confidence interval for quantitative variables. <sup>a</sup>student t test. <sup>b</sup>chi square test.
